# Supplementary material for: Genome-Wide Identification of the Aconitase Gene Family in Tomato (Solanum lycopersicum) and CRISPR-Based Functional Characterization of SlACO2 on Male-Sterility
Source: Int J Mol Sci. 2022 Nov 12;23(22):13963. doi: 10.3390/ijms232213963 (PMC9699144; doi:10.3390/ijms232213963)
Supplement: Supplementary file 1 [file ijms-23-13963-s001.zip › ijms-2035388-supplementary.pdf]

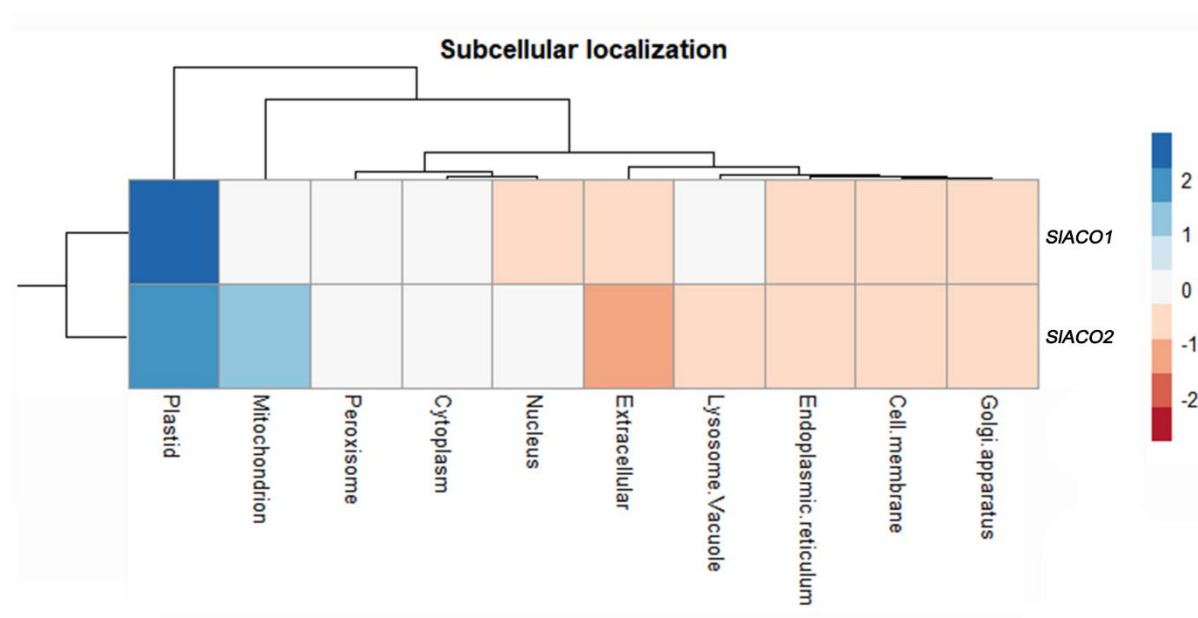

Supplementary Figure S1. Sub-cellular location of SIACO proteins.

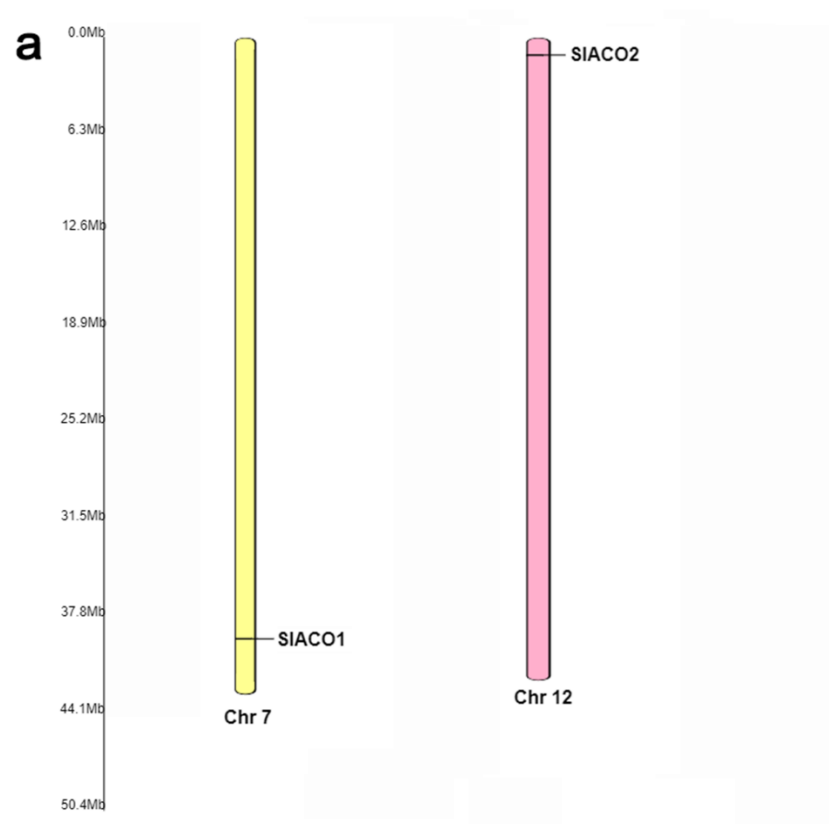

**b**

| LOCUS 1 | LOCUS 2 | Ka     | Ks     | Ka/KS    | Duplication | Time (MYA) |
|---------|---------|--------|--------|----------|-------------|------------|
| SIACO1  | SIACO2  | 0.0628 | 0.5448 | 0.115272 | Segmental   | 0.665      |

Supplementary Figure S2: Chromosomal location and duplication pattern of *SIACOs*.

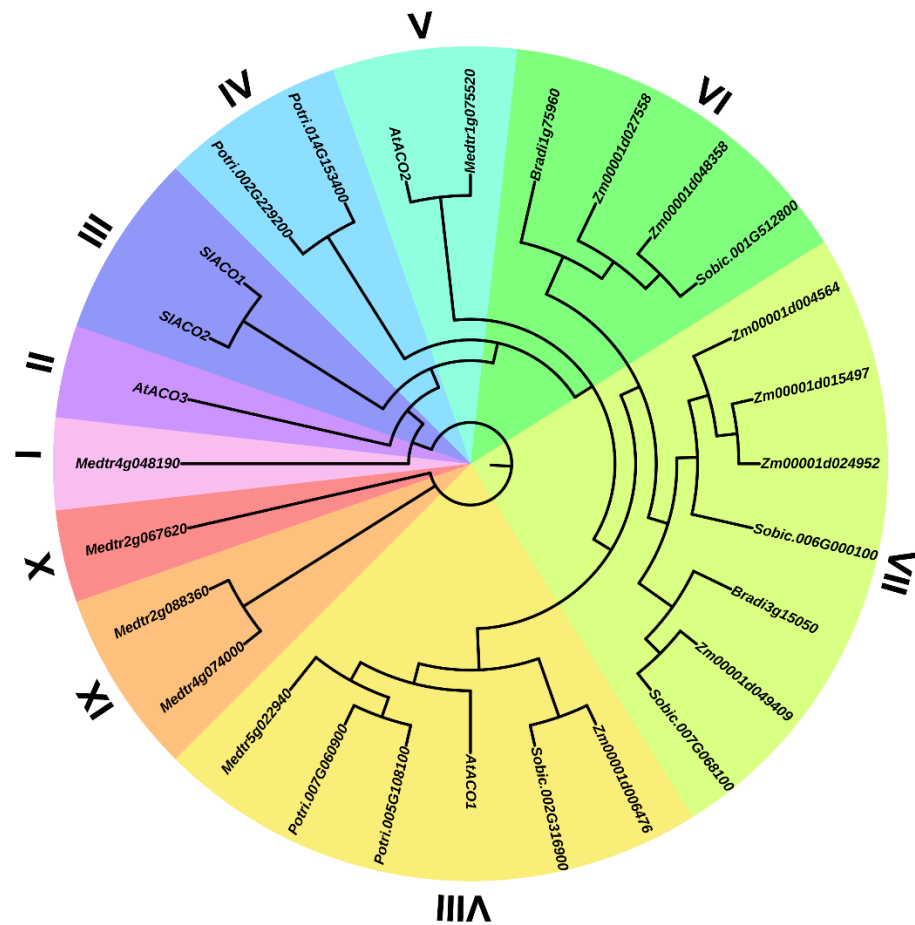

Supplementary Figure S3: Phylogenetic analysis of ACO genes in different organisms.

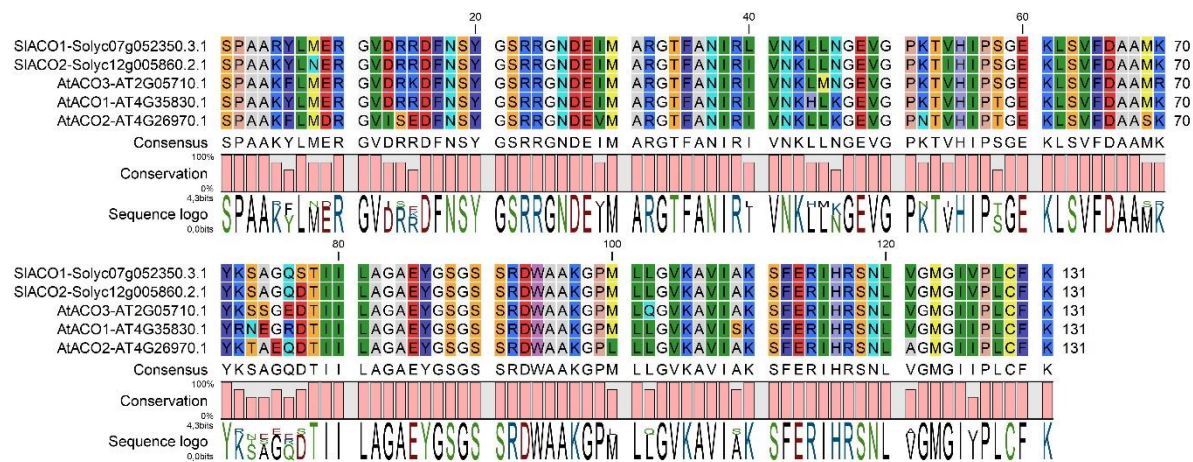

Supplementary Figure S4: Alignment of aconitase swivel domains of AtACOs and SIACOs proteins.

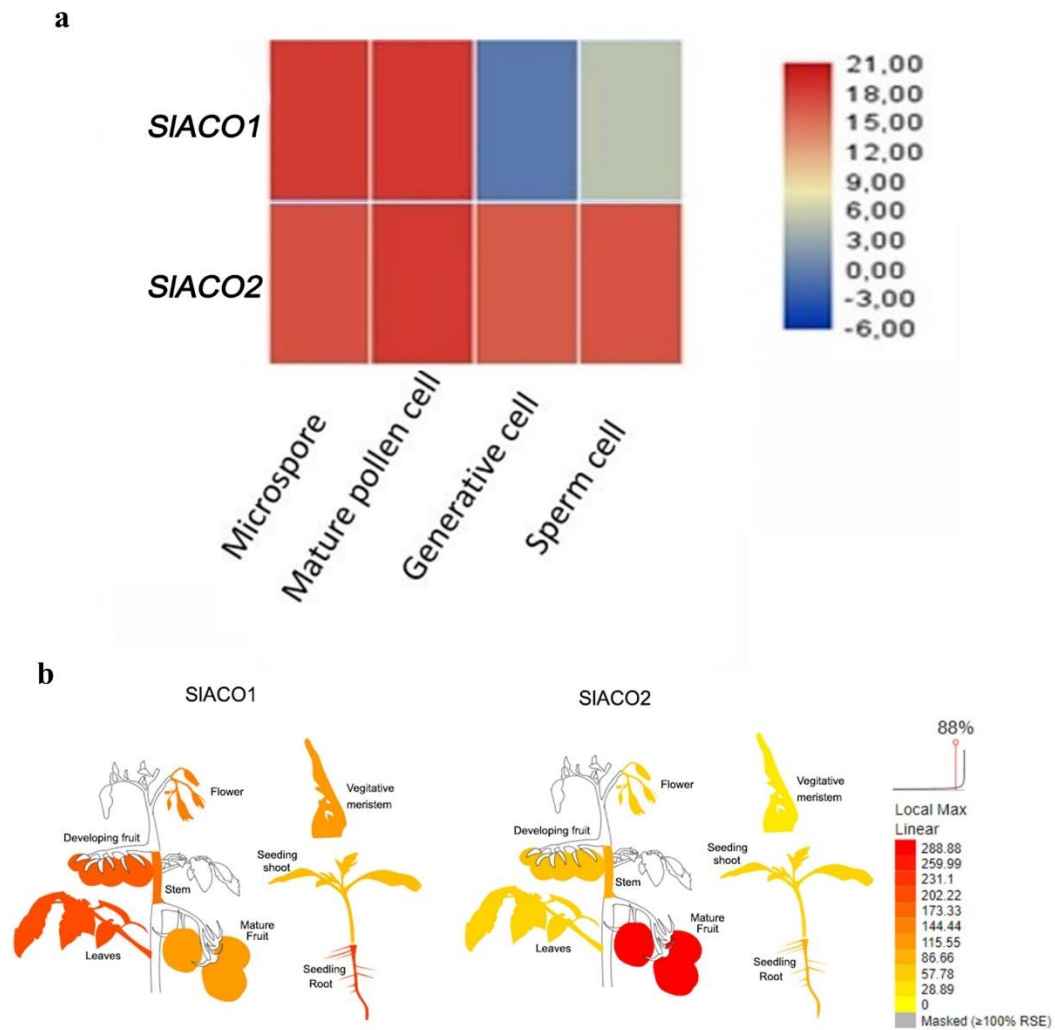

Supplementary Figure S5: Expression profiles of *SIACOs* in various tissues and organs. a) Expression analysis of *SIACOs* using RNA-seq data b) Organ and tissue-specific expression of *SIACOs*

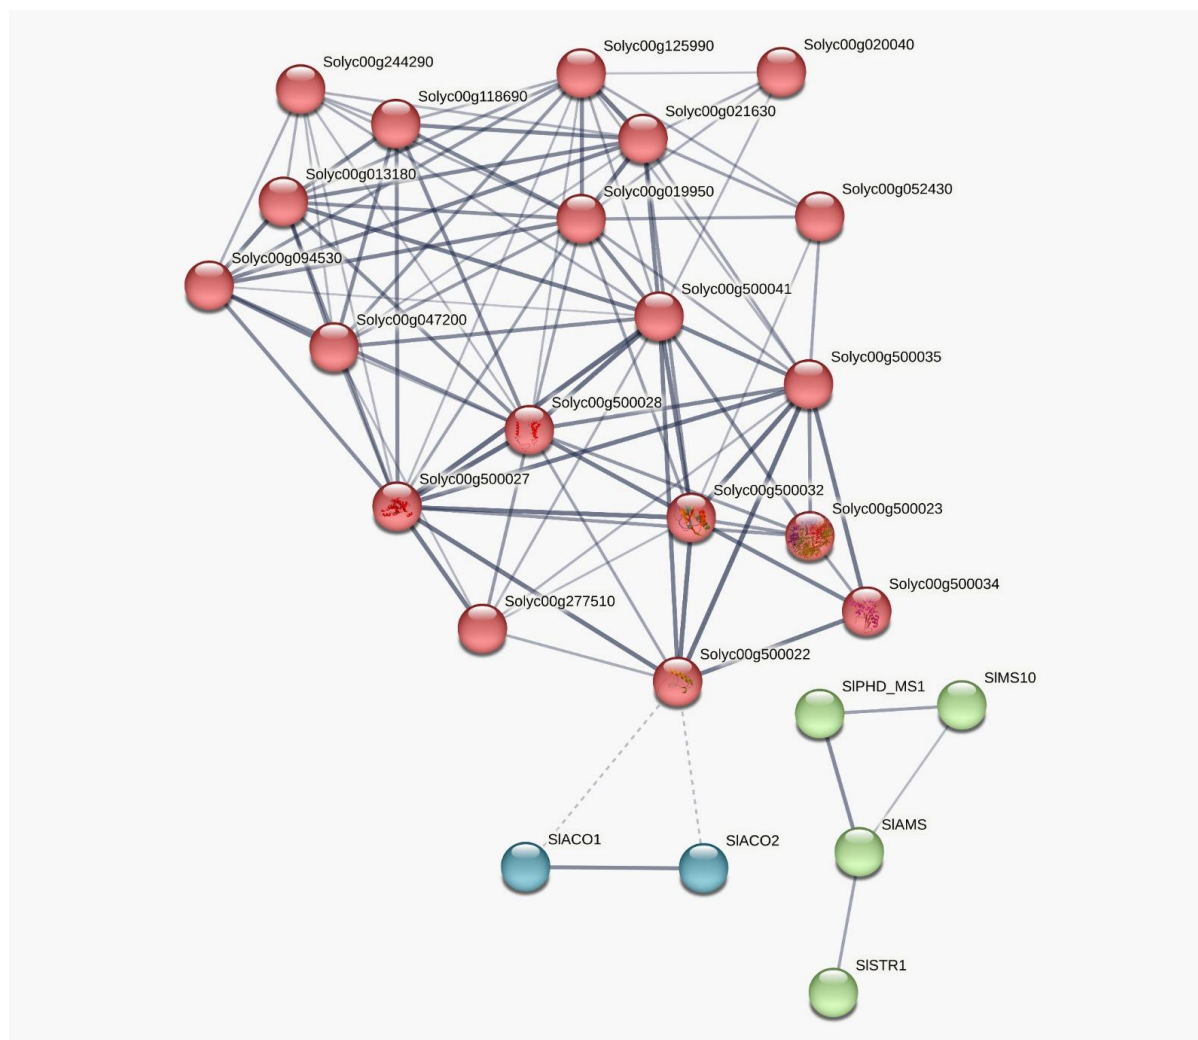

Supplementary Figure S6: Protein-protein interaction network of SIACOs.

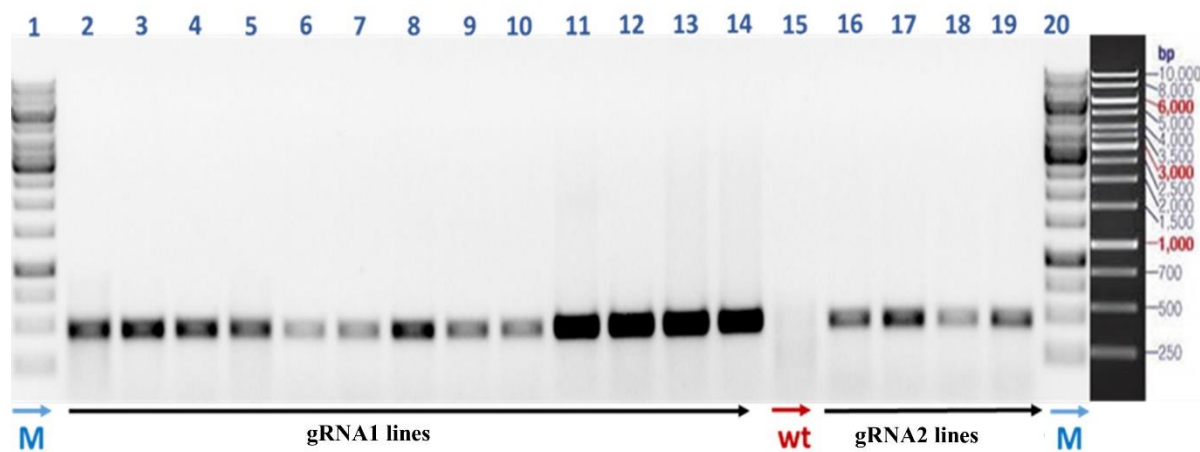

Supplementary Figure S7: PCR confirmation of SLACO lines using *hptII*-specific primers.

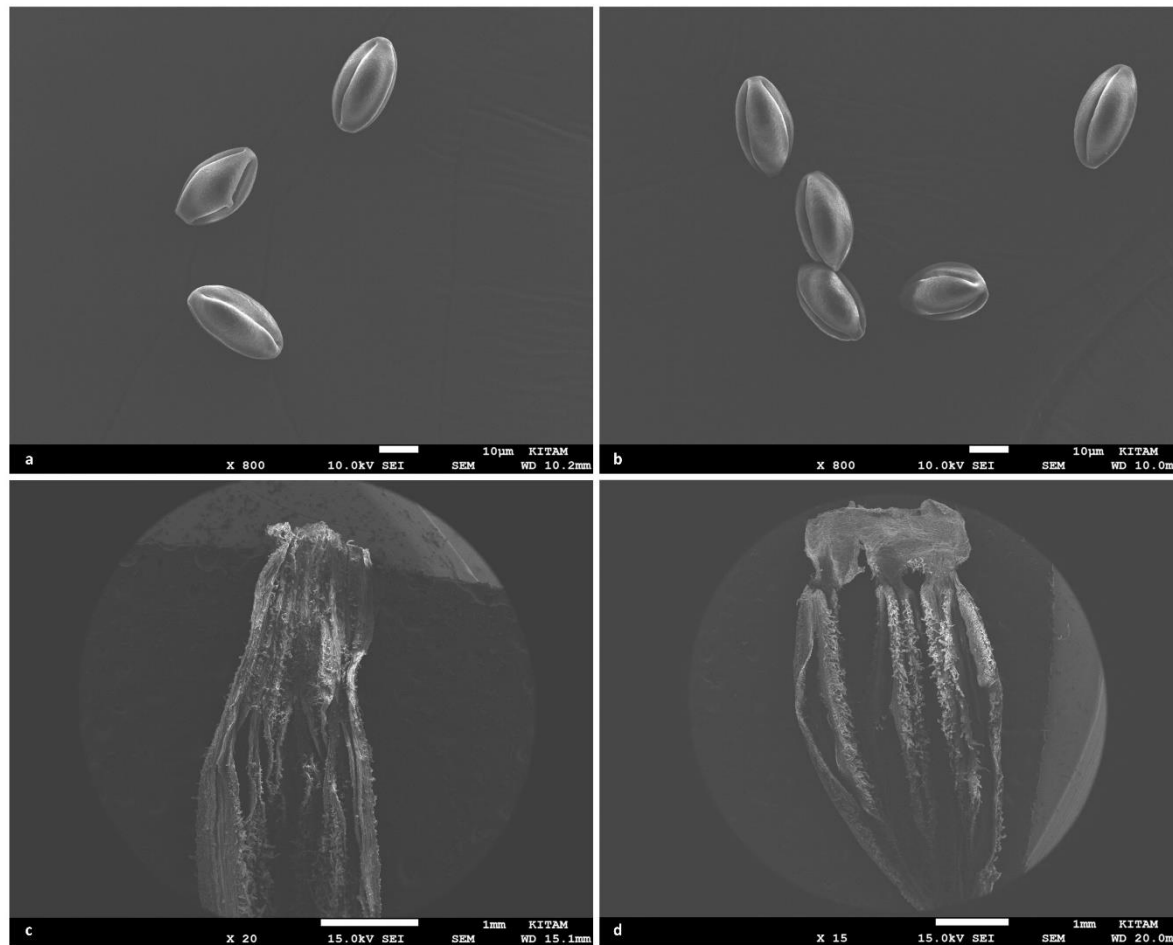

Supplementary Figure S8: Scanning electron microscope images of a) pollen grains and b) anthers.

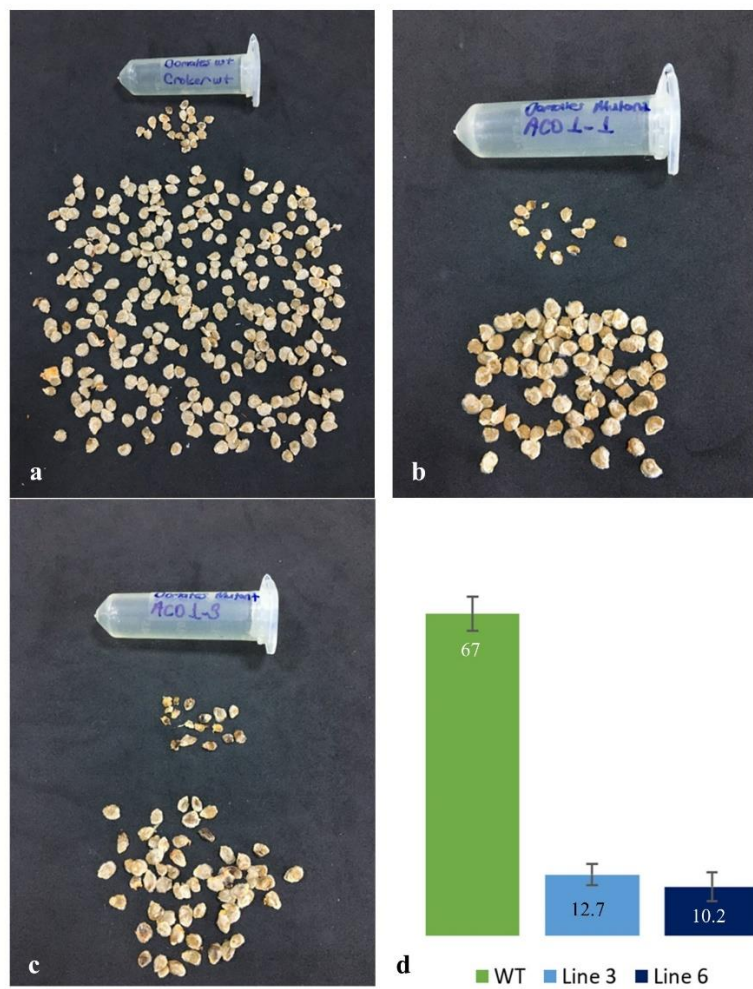

Supplementary Figure S9: Seed statics of WT and mutant plants. a) Seeds obtained from WT plants b)Line 3 c)Line 6 d) Graphic showing the seed numbers.

Supplementary Table S1: MCL Clusters of SIACOs with genes related to pollen development and male-sterility.

| #clustering method | cluster number | cluster color | gene count | protein name       | protein identifier | protein description                                                                                                                                                                                                                                                                                                  |
|--------------------|----------------|---------------|------------|--------------------|--------------------|----------------------------------------------------------------------------------------------------------------------------------------------------------------------------------------------------------------------------------------------------------------------------------------------------------------------|
| MCL                | 1              | Red           | 17         | Solyc00g013180     | Solyc00g013180.1.1 | annotation not available                                                                                                                                                                                                                                                                                             |
| MCL                | 1              | Red           | 17         | Solyc00g019950     | Solyc00g019950.1.1 | Nadh dehydrogenase (ubiquinone) fe-s protein 3; Belongs to the complex I 30 kDa subunit family                                                                                                                                                                                                                       |
| MCL                | 1              | Red           | 17         | Solyc00g020040     | Solyc00g020040.1.1 | Uncharacterized protein loc101259037; ABC-type heme transporter subunit                                                                                                                                                                                                                                              |
| MCL                | 1              | Red           | 17         | Solyc00g021630     | Solyc00g021630.1.1 | Nadh-ubiquinone oxidoreductase chain 6; Core subunit of the mitochondrial membrane respiratory chain NADH dehydrogenase (Complex I) th                                                                                                                                                                               |
| MCL                | 1              | Red           | 17         | Solyc00g047200     | Solyc11g056490.1.1 | annotation not available                                                                                                                                                                                                                                                                                             |
| MCL                | 1              | Red           | 17         | Solyc00g052430     | Solyc00g052430.2.1 | annotation not available                                                                                                                                                                                                                                                                                             |
| MCL                | 1              | Red           | 17         | Solyc00g094530     | Solyc00g094530.1.1 | annotation not available                                                                                                                                                                                                                                                                                             |
| MCL                | 1              | Red           | 17         | Solyc00g118690     | Solyc00g118690.1.1 | annotation not available                                                                                                                                                                                                                                                                                             |
| MCL                | 1              | Red           | 17         | Solyc00g125990     | Solyc00g125990.1.1 | annotation not available                                                                                                                                                                                                                                                                                             |
| MCL                | 1              | Red           | 17         | Solyc00g244290     | Solyc00g244290.1.1 | annotation not available                                                                                                                                                                                                                                                                                             |
| MCL                | 1              | Red           | 17         | Solyc00g277510     | Solyc00g277510.1.1 | annotation not available                                                                                                                                                                                                                                                                                             |
| MCL                | 1              | Red           | 17         | Solyc00g500027     | Solyc01g007530.2.1 | Cytochrome b6; Component of the cytochrome b6-f complex, which mediates electron transfer between photosystem II (PSII) and photosystem I                                                                                                                                                                            |
| MCL                | 1              | Red           | 17         | Solyc00g500028     | Solyc01g007540.2.1 | Cytochrome b6/f complex subunit iv; Cytochrome b6-f complex subunit 4; Component of the cytochrome b6-f complex, which mediates electron                                                                                                                                                                             |
| MCL                | 1              | Red           | 17         | Solyc00g500041     | Solyc11g021230.1.1 | NAD(P)H-quinone oxidoreductase subunit 1, chloroplastic; NDH shuttles electrons from NAD(P)H:plastoquinone, via FMN and iron-sulfur (Fe) clusters, to ferredoxin (Fd) and finally to ferredoxin-NADP+ reductase (FNR). It conserves the redox energy in a proton gradient; Belongs to the complex I subunit 1 family |
| MCL                | 1              | Red           | 17         | Solyc12g005630.1.1 | Solyc12g005630.1.1 | Cytochrome b6-f complex iron-sulfur subunit, chloroplastic; Cytochrome b6-f complex iron-sulfur subunit; Photosynthetic electron transfer C                                                                                                                                                                          |
| MCL                | 1              | Red           | 17         | petA               | Solyc01g007380.1.1 | Apocytochrome f; Cytochrome f; Component of the cytochrome b6-f complex, which mediates electron transfer between photosystem II (PSII) a                                                                                                                                                                            |
| MCL                | 1              | Red           | 17         | petG               | Solyc01g007430.2.1 | Cytochrome b6-f complex subunit 5; Component of the cytochrome b6-f complex, which mediates electron transfer between photosystem II (PSI                                                                                                                                                                            |
| MCL                | 2              | Yellow        | 9          | Solyc00g021640     | Solyc00g021640.2.1 | annotation not available                                                                                                                                                                                                                                                                                             |
| MCL                | 2              | Yellow        | 9          | Solyc00g500022     | Solyc01g007460.2.1 | 30S ribosomal protein S18, chloroplastic ; Belongs to the bacterial ribosomal protein bS18 family                                                                                                                                                                                                                    |
| MCL                | 2              | Yellow        | 9          | Solyc00g500023     | Solyc01g007490.2.1 | ATP-dependent Clp protease proteolytic subunit; Cleaves peptides in various proteins in a process that requires ATP hydrolysis. Has a chymotr                                                                                                                                                                        |
| MCL                | 2              | Yellow        | 9          | Solyc00g500032     | Solyc01g007600.2.1 | 50S ribosomal protein L16, chloroplastic ; Belongs to the universal ribosomal protein uL16 family                                                                                                                                                                                                                    |
| MCL                | 2              | Yellow        | 9          | Solyc00g500034     | Solyc01g007610.2.1 | 30S ribosomal protein S3, chloroplastic ; Belongs to the universal ribosomal protein uS3 family                                                                                                                                                                                                                      |
| MCL                | 2              | Yellow        | 9          | Solyc00g500035     | Solyc01g007630.2.1 | 50S ribosomal protein L2, chloroplastic ; Belongs to the universal ribosomal protein uL2 family                                                                                                                                                                                                                      |
| MCL                | 2              | Yellow        | 9          | Solyc04g049260.1.1 | Solyc04g049260.1.1 | annotation not available                                                                                                                                                                                                                                                                                             |
| MCL                | 2              | Yellow        | 9          | Solyc08g006840.2.1 | Solyc08g006840.2.1 | annotation not available                                                                                                                                                                                                                                                                                             |
| MCL                | 2              | Yellow        | 9          | rps16              | Solyc07g008660.2.1 | 30S ribosomal protein S16, chloroplastic; 30S ribosomal protein S16                                                                                                                                                                                                                                                  |
| MCL                | 3              | Green         | 8          | SIACO1             | Solyc07g052350.2.1 | Aconitate hydratase, cytoplasmic; Aconitate hydratase; Catalyzes the isomerization of citrate to isocitrate via cis-aconitate                                                                                                                                                                                        |

|     |   |       |   |                    |                    |                                                                                                                                             |
|-----|---|-------|---|--------------------|--------------------|---------------------------------------------------------------------------------------------------------------------------------------------|
| MCL | 3 | Green | 8 | SIACO2             | Solyc12g005860.1.1 | Aconitate hydratase, cytoplasmic; Aconitate hydratase; Catalyzes the isomerization of citrate to isocitrate via cis-aconitate               |
| MCL | 3 | Green | 8 | Solyc01g073740.2.1 | Solyc01g073740.2.1 | Citrate synthase, mitochondrial; Belongs to the citrate synthase family                                                                     |
| MCL | 3 | Green | 8 | Solyc05g009030.2.1 | Solyc05g009030.2.1 | 3-isopropylmalate dehydrogenase, chloroplastic; 3-isopropylmalate dehydrogenase; Catalyzes the oxidation of 3-carboxy-2-hydroxy-4- methylp  |
| MCL | 3 | Green | 8 | Solyc07g055840.2.1 | Solyc07g055840.2.1 | annotation not available                                                                                                                    |
| MCL | 3 | Green | 8 | Solyc12g011000.1.1 | Solyc12g011000.1.1 | annotation not available                                                                                                                    |
| MCL | 4 | Blue  | 4 | SIAMS              | Solyc08g062780.1.1 | Transcription factor aborted microspores isoform x2; Uncharacterized protein; Basic helix-loop-helix (bHLH) DNA-binding superfamily protein |
| MCL | 4 | Blue  | 4 | SIMS10             | Solyc02g079810.1.1 | Transcription factor dyt1; Uncharacterized protein; Basic helix-loop-helix (bHLH) DNA-binding superfamily protein                           |
| MCL | 4 | Blue  | 4 | SIPHD_MS1          | Solyc04g008420.1.1 | Phd finger protein male sterility 1; RING/FYVE/PHD zinc finger superfamily protein                                                          |
| MCL | 4 | Blue  | 4 | SISTR1             | Solyc03g053130.2.1 | Protein strictosidine synthase-like 13; Uncharacterized protein; Calcium-dependent phosphotriesterase superfamily protein                   |

| Supplementary Table S2: Predicted functional partners of SIACOs. |                                                                                                                                                                                                                                                                                                                   |       |
|------------------------------------------------------------------|-------------------------------------------------------------------------------------------------------------------------------------------------------------------------------------------------------------------------------------------------------------------------------------------------------------------|-------|
| Gene ID or Name                                                  | Description                                                                                                                                                                                                                                                                                                       | Score |
| petA                                                             | Apocytochrome f; Cytochrome f; Component of the cytochrome b6-f complex, which mediates electron transfer between photosystem II (PSII) and photosystem I (PSI), cyclic electron flow around PSI, and state transitions                                                                                           | 0.999 |
| petG                                                             | Cytochrome b6-f complex subunit 5; Component of the cytochrome b6-f complex, which mediates electron transfer between photosystem II (PSII) and photosystem I (PSI), cyclic electron flow around PSI, and state transitions. PetG is required for either the stability or assembly of the cytochrome b6-f complex | 0.999 |
| Solyc01g073740.2.1                                               | Citrate synthase, mitochondrial; Belongs to the citrate synthase family                                                                                                                                                                                                                                           | 0.999 |
| Solyc05g009030.2.1                                               | 3-isopropylmalate dehydrogenase, chloroplastic; 3-isopropylmalate dehydrogenase; Catalyzes the oxidation of 3-carboxy-2-hydroxy-4- methylpentanoate (3-isopropylmalate) to 3-carboxy-4-methyl-2- oxopentanoate. The product decarboxylates to 4-methyl-2 oxopentanoate                                            | 0.999 |
| Solyc07g055840.2.1                                               | annotation not available                                                                                                                                                                                                                                                                                          | 0.999 |
| Solyc12g005630.1.1                                               | Cytochrome b6-f complex iron-sulfur subunit, chloroplastic; Cytochrome b6-f complex iron-sulfur subunit; Photosynthetic electron transfer C                                                                                                                                                                       | 0.999 |
| Solyc12g011000.1.1                                               | annotation not available                                                                                                                                                                                                                                                                                          | 0.999 |
| Solyc04g049260.1.1                                               | annotation not available                                                                                                                                                                                                                                                                                          | 0.998 |
| rps16                                                            | 30S ribosomal protein S16, chloroplastic; 30S ribosomal protein S16                                                                                                                                                                                                                                               | 0.998 |
| Solyc08g006840.2.1                                               | annotation not available                                                                                                                                                                                                                                                                                          | 0.998 |

Supplementary Table S3: Changes in  
pollen viability in WT and SIACO2.

| Lines  | Pollen activity |               |           |
|--------|-----------------|---------------|-----------|
|        | active %        | semi-active % | sterile % |
| WT     | 85.10           | 10.63         | 4.25      |
| Line 3 | 4.00            | 12.00         | 84.00     |
| Line 6 | 2.00            | 11.00         | 87.00     |
